# Supplementary material
Source: Springer Nature journal article supplement (https://www.springermedizin.de/resource/supplementary/13054_2013_2973_MOESM1_ESM.pdf/9712014)

Relative hyperlactatemia Control

OR (95% CI)

N Adjusted P P interaction

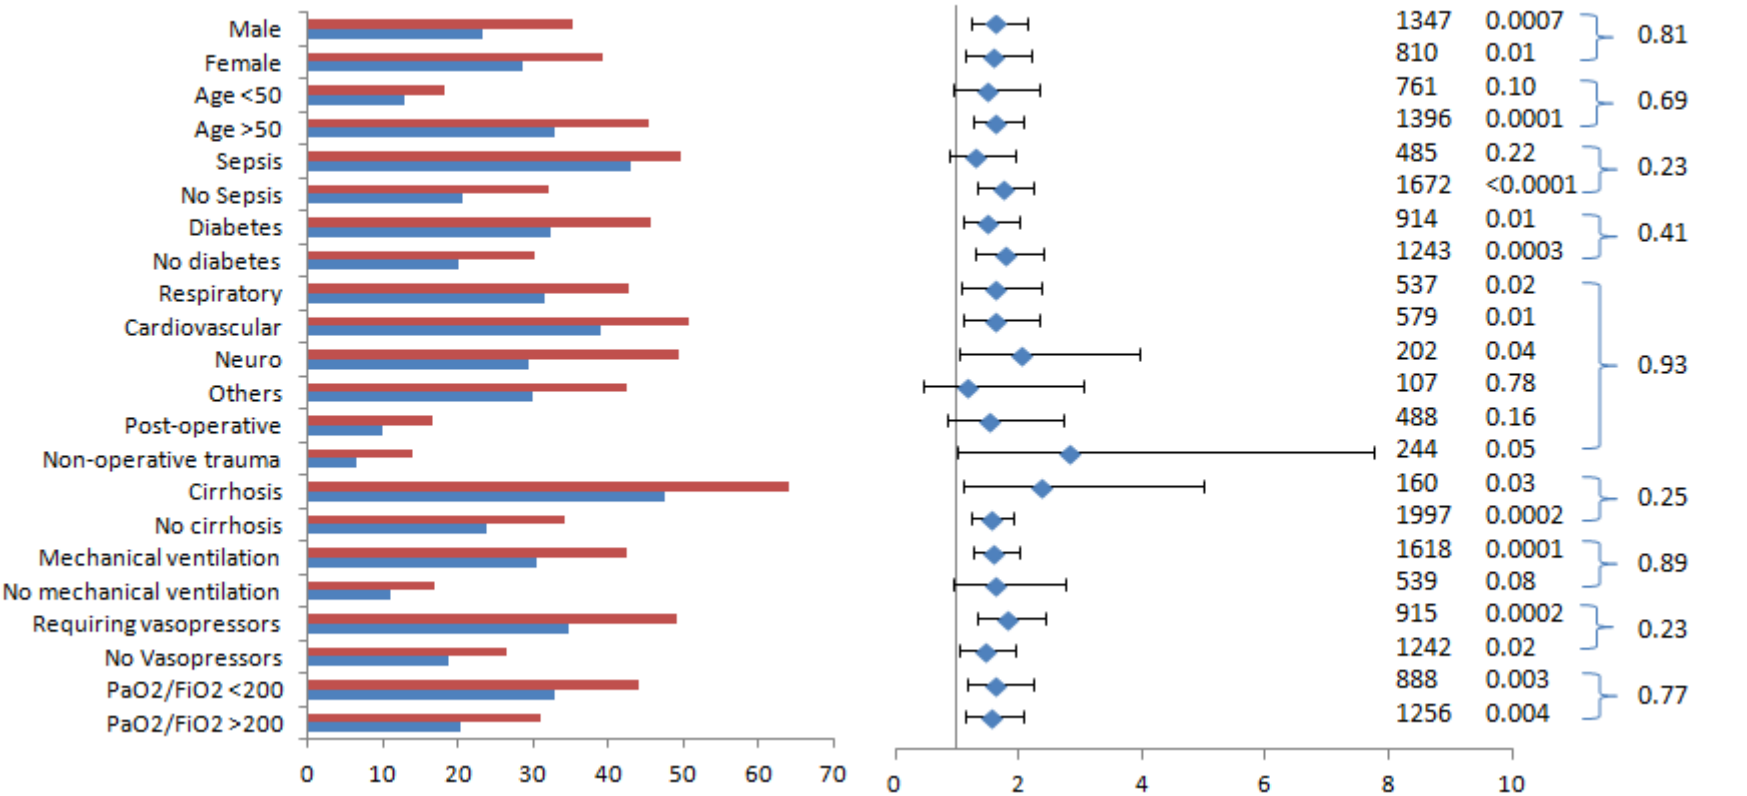

Supplement: MOESM1 [file 9712014]
